# Supplementary material for: Spatial Distribution, Bioaccumulation and Health Risk Assessment of Trace Elements in Silver Pomfret (Pampus argenteus) from the Bay of Bengal: The First Comparative Study Across Major Fishing Grounds of Bangladesh.
Source: Research Square preprint supplement (doi:10.21203/rs.3.rs-6148746/v1), 2025-03-24
Supplement: Supplementary file 1 [file 8cb2f6d22dbf01a431409d16.docx]

**Research Highlights**

- Elevated levels of Cr, Mn, Co, and Se were found in silver pomfret from the Bay of Bengal.
- Significant bioaccumulation was observed, particularly for Mn, Se, and Co, with high IMBI values.
- EDI, THQ, and HI values were below harmful thresholds, indicating no immediate health risks.
- A high Se/Hg molar ratio suggested protection against mercury toxicity.
- Industrial activities were identified as the main sources of trace element contamination,
